# Supplementary material for: Hyperandrogenic Symptoms Are a Persistent Suffering in Midlife Women with PCOS; a Prospective Cohort Study in Sweden
Source: MDPI journal article supplement (doi:10.3390/biomedicines11010096), 2022-12-30
Supplement: s1 [file s1]

**Table S1. Biochemical hyperandrogenism** analysed by weight class. Controls vs women with PCOS.

|                                        | <b>Controls</b>    | <b>PCOS</b>        |                 |
|----------------------------------------|--------------------|--------------------|-----------------|
|                                        | n (%)              | n (%)              | <i>p</i> -value |
| <b>Normal weight</b>                   | n=21               | n=21               |                 |
| Testosterone, ng/mL, median (min, max) | 0.27 (0.13, 0.51)  | 0.34 (0.20, 0.59)  | 0.012           |
| SHBG, mmol/L, median (min, max)        | 71.0 (38.0, 142.0) | 57.5 (35.0, 110.0) | 0.148           |
| FAI, median (min, max)                 | 0.004 (0.00, 0.01) | 0.006 (0.00, 0.01) | 0.010           |
| <b>Overweight</b>                      | n=13               | n=36               |                 |
| Testosterone, ng/mL, median (min, max) | 0.32 (0.13, 0.70)  | 0.36 (0.02, 1.29)  | 0.402           |
| SHBG, mmol/L, median (min, max)        | 76.0 (32.0, 125.0) | 43.0 (19.0, 94.0)  | 0.005           |
| FAI, median (min, max)                 | 0.005 (0.00, 0.01) | 0.009 (0.00, 0.02) | 0.003           |
| <b>Overweight and obese</b>            | n=18               | n=106              |                 |
| Testosterone, ng/mL, median (min, max) | 0.35 (0.13, 0.81)  | 0.35 (0.02, 1.29)  | 0.791           |
| SHBG, mmol/L, median (min, max)        | 59.0 (27.0, 125.0) | 39.0 (6.4, 108.0)  | 0.004           |
| FAI, median (min, max)                 | 0.007 (0.00, 0.01) | 0.009 (0.00, 0.06) | 0.027           |

Data were not normally distributed. Mann-Whitney U-test was used.
